# Supplementary material for: Environmental enrichment enhances patterning and remodeling of synaptic nanoarchitecture as revealed by STED nanoscopy
Source: eLife. 2022 Feb 23;11:e73603. doi: 10.7554/eLife.73603 (PMC8903838; doi:10.7554/eLife.73603)
Supplement: Figure 2—source data 1. [file elife-73603-fig2-data1.xlsx]

## Sheet: Data
	t=0				t=0
Enrichment	PSD95_EE (nm^2)	spine_EE (nm^2)		Control	PSD95_CTR (nm^2)	spine_CTR(nm^2)
	539111	1.62543e+06			148503	261005
	55801.1	390608			112502	255605
	329407	1.21682e+06			246605	959419
	811816	1.48773e+06			161103	968419
	90901.8	584112			216004	542711
	45900.9	546311			44100.9	163803
	63901.3	445509			81901.6	308706
	89101.8	765015			559811	1.24022e+06
	134103	420308			458109	964819
	102602	1.31763e+06			178204	627313
	66601.3	650713			351907	1.08452e+06
	317706	584112			592212	1.30593e+06
	59401.2	281706			122402	289806
	69301.4	290706			116102	400508
	166503	502210			721814	1.35273e+06
					233105	446409
	60301.2	440109			289806	634513
	130503	286206			140403	290706
	325807	1.04492e+06			295206	391508
	124202	459909			187204	343807
	153903	588612			68401.4	246605
	67501.4	336607			76501.5	361807
	138603	411308			67501.4	405008
	150303	452709			65701.3	291606
	124202	512110
	125103	506710
					523810	1.79824e+06
	665113	1.87924e+06			757815	1.15742e+06
	143103	610212			378008	1.05752e+06
	533711	1.13402e+06			372607	1.10972e+06
	78301.6	368107			635413	1.21772e+06
	231305	756015			696614	1.55883e+06
	119702	501310			130503	441909
	261005	1.01972e+06			167403	417608
	37800.8	564311			196204	346507
	82801.7	372607			135003	296106
	79201.6	1.01702e+06			531911	880218
	90001.8	229505			181804	414008
	79201.6	346507			252905	535511
	56701.1	177304			986420	1.52913e+06
	133203	620112			63901.3	281706
	170103	606612			158403	462609
	209704	569711			248405	378908
	160203	619212			315906	677714
	65701.3	312306			78301.6	250205
	103502	638113			60301.2	182704
	295206	1.51473e+06			142203	332107
	374407	1.51473e+06			160203	444609
	35100.7	263705			237605	602112
	99002	422108			440109	1.04852e+06
					1.46703e+06	1.94854e+06
					135903	385208
					920718	2.10964e+06
					702014	1.57683e+06
					425709	869417
	72901.5	459909			351007	708314
	99002	810016			51301	191704
	36000.7	264605			134103	361807
	201604	510310			104402	404108
	354607	417608			67501.4	215104
	576012	1.17362e+06			403208	1.01522e+06
	206104	464409			562511	1.23482e+06
	132303	260105			601212	863117
	171903	866717			265505	748815
	204304	289806			105302	203404
	96301.9	422108			428409	1.02782e+06
	284406	700214			360907	756015
	169203	515710
	346507	631813
	278106	648013
	126903	594912
	140403	303306			222304	896418
	155703	395108			47701	194404
	324006	985520			711014	1.22942e+06
	108002	488710			336607	841517
					182704	892818
					378908	951319
					150303	488710
					252005	1.30863e+06
	229505	435609
	99902	477010			135903	254705
	138603	403208			241205	526511
	74701.5	237605			132303	207904
	89101.8	279006			243005	539111
	78301.6	126903			74701.5	297006
	200704	866717			144903	311406
	111602	867617			207904	414008
	75601.5	497710			225905	600312
	87301.7	696614			84601.7	414008
	75601.5	446409			97201.9	261905
	155703	594912			152103	445509
	322206	1.05482e+06			128703	294306
	107102	397808			647113	2.15284e+06
	136803	546311			171003	498610
	152103	459009			314106	578712
	160203	630913			223204	369907
					1.32933e+06	1.61913e+06
					84601.7	243005
					220504	817216
					87301.7	381608
	219604	1.08812e+06			170103	389708
	56701.1	584112			100802	340207
	26100.5	540011			89101.8	294306
	197104	631813			246605	634513
	64801.3	414908			72001.4	156603
	90901.8	376208			170103	292506
	85501.7	549911			665113	1.66233e+06
	261905	794716			182704	385208
	136803	851417			183604	305106
	99902	594912			192604	251105
	59401.2	251105			203404	714614
	34200.7	388808			387908	1.10072e+06
	49501	692114			90001.8	301506
	98102	355507
	19800.4	367207
	294306	1.07102e+06
	144903	519310			207004	405908
	115202	402308			135003	228605
	464409	1.53723e+06			106202	223204
	70201.4	478810			137703	253805
	102602	822616			297006	532811
	19800.4	236705			93601.9	169203
	584112	1.22852e+06			298806	844217
	371707	1.01612e+06			365407	673213
	390608	1.50393e+06			95401.9	320406
	33300.7	377108			161103	271805
	115202	854117			576012	677714
	83701.7	657013			336607	823516
	29700.6	349207			334807	508510
	131403	540011			253805	454509
	45900.9	373507			162903	187204
	316806	2.03314e+06			401408	795616
	98102	638113			426609	639913
	249305	903618			102602	147603
	119702	616512			81001.6	124202
	51301	505810
	68401.4	413108			203404	818116
	108002	509410			37800.8	244805
	155703	578712			117002	501310
	126003	242105			36000.7	1.13942e+06
	190804	509410			202504	585012
	90901.8	231305			33300.7	661513
	106202	347407			10800.2	223204
	126903	404108			76501.5	819916
	534611	1.66413e+06			227705	1.04762e+06
	73801.5	195304			38700.8	378908
	173703	374407			134103	511210
	153003	345607			138603	721814
	439209	1.30593e+06			114302	1.24832e+06
	157503	441009
	286206	1.20422e+06
	124202	305106
	148503	308706
	481510	973819
	190804	534611
	191704	473409
	258305	1.08452e+06
	481510	1.11962e+06
	446409	777616
	342007	835217			86401.7	389708
					53101.1	240305
					270905	522910
					22500.5	490510
					39600.8	304206
					56701.1	285306
					83701.7	431109
					207004	1.03142e+06
					138603	801016
	369907	525611			44100.9	297906
	91801.8	205204			59401.2	318606
	146703	624612			80101.6	463509
	147603	473409			441909	1.04672e+06
	124202	193504			56701.1	225004
	152103	306006			94501.9	382508
	193504	762315			98102	396908
	404108	1.00352e+06			55801.1	696614
	48601	144903			78301.6	527411
	124202	339307			200704	549911
	102602	199804			53101.1	259205
	138603	284406			196204	676814
	249305	959419			54901.1	407708
	559811	1.50933e+06			63001.3	616512
	1.01342e+06	1.67133e+06			67501.4	581412
	219604	373507			68401.4	304206
	504910	1.24202e+06			109802	412208
	199804	440109
	258305	637213
	115202	220504			475210	866717
	185404	623712			55801.1	300606
	126003	367207			530111	887418
	211504	361807			355507	684914
	113402	215104			54901.1	210604
					64801.3	188104
					196204	728115
					222304	501310
					302406	1.19342e+06
	491410	1.12592e+06			203404	687614
	181804	495010			770415	1.77214e+06
	166503	428409			124202	337507
	68401.4	354607			232205	465309
	77401.5	303306			138603	345607
	447309	926119			265505	831617
	130503	303306			378908	1.64523e+06
	108002	512110			54901.1	484210
	373507	2.22304e+06			95401.9	507610
	85501.7	442809			81001.6	564311
	86401.7	464409			44100.9	548111
	114302	329407
	438309	2.05924e+06
	100802	200704			262805	626413
	146703	401408			130503	310506
	175504	281706			389708	836117
	91801.8	201604			121502	260105
	92701.9	225905			174603	301506
	324906	771315			170103	256505
					126003	232205
					286206	702914
					135003	347407
					40500.8	157503
					164703	380708
					114302	535511
					141303	669613
					90901.8	224104
	69301.4	367207			220504	793816
	164703	657013			124202	342007
	262805	702914			192604	701114
	258305	549911			72001.4	260105
	122402	339307			189904	865817
	99902	371707			49501	234005
	127803	434709			238505	538211
	183604	1.27893e+06			122402	502210
	36900.7	458109			44100.9	216904
	102602	489610			52201	431109
	144903	1.65243e+06			161103	623712
	158403	969319			518410	1.77214e+06
	194404	882918
	117902	853217
	161103	571511			207004	375308
	302406	1.50483e+06			405908	780316
	157503	343807			63001.3	147603
	324906	758715			71101.4	359107
	331207	790216			110702	285306
	162903	463509			215104	308706
					142203	305106
					95401.9	182704
					138603	334807
					57601.2	194404
					84601.7	244805
					89101.8	218704
					68401.4	217804
					248405	839717
	151203	717314			243005	470709
	653413	1.24292e+06			149403	416708
	197104	392408			84601.7	156603
	119702	221404			437409	1.22582e+06
	970219	1.75864e+06			379808	1.11602e+06
	241205	693914			91801.8	624612
	132303	348307			126003	198004
	145803	251105			70201.4	228605
	195304	280806			140403	431109
	96301.9	176404			297906	1.34553e+06
	172803	686714			243905	1.28523e+06
	105302	333007			366307	732615
	158403	270905			127803	433809
	355507	584112			169203	525611
	177304	315006			212404	425709
	488710	926119			164703	434709
	163803	185404
	62101.2	203404
	129603	381608			251105	420308
	117002	243905			173703	616512
	105302	282606			148503	402308
	162003	464409			345607	861317
	118802	227705			80101.6	396008
	158403	405908			217804	610212
	144003	273605			242105	785716
	107102	198004			99902	313206
	153003	224104			85501.7	243905
	149403	289806			163803	245705
	284406	363607			256505	361807
	115202	321306			548111	979220
					111602	239405
					103502	330307
					127803	216004
					90901.8	177304
					190804	375308
					397808	794716
					146703	246605
					105302	224104
	302406	332107			222304	881118
	322206	665113			288906	919818
	490510	610212
	219604	435609
	242105	417608			86401.7	1.01522e+06
	215104	476110			30600.6	493210
	336607	556211			111602	748815
	166503	306006			227705	780316
	74701.5	359107			133203	594012
	157503	230405			57601.2	423908
	455409	1.32303e+06			74701.5	283506
	99002	819016			260105	1.03412e+06
	208804	309606			513010	2.09704e+06
	268205	490510			794716	1.47873e+06
	161103	282606			500410	1.48233e+06
	31500.6	194404			65701.3	152103
	190804	326707			82801.7	381608
	382508	554411			160203	238505
	189004	245705			142203	642613
	168303	622812			54001.1	186304
					625513	2.11774e+06
					606612	1.15022e+06
					58501.2	252005
					144903	333007
					229505	846017
					312306	856817
					1.26633e+06	2.38685e+06
					90001.8	309606
	183604	635413
	264605	405908
	174603	471609
	111602	376208			222304	621912
	90001.8	337507			77401.5	199804
	120602	198004			87301.7	287106
	302406	859517			113402	417608
	501310	798316			1.73973e+06	4.9663e+06
	115202	454509			1.43643e+06	2.30765e+06
	153003	324906			559811	1.15112e+06
	154803	445509
					215104	904518
	195304	292506			575112	945019
	68401.4	112502			624612	963919
	36900.7	315006			137703	448209
	168303	355507			463509	1.13762e+06
	122402	234905			108002	391508
	140403	332107			1.45083e+06	2.71175e+06
	125103	276306			301506	780316
	122402	243905			143103	312306
	263705	539111			46800.9	381608
	109802	367207			62101.2	291606
	148503	372607
	186304	474309
	96301.9	418508
	243905	721814
	142203	319506			121502	499510
	263705	789316			165603	570611
	153003	279006			151203	489610
	189004	394208			173703	639013
	159303	361807			313206	1.41033e+06
	345607	704714			195304	583212
	153903	316806			111602	341107
	113402	350107			59401.2	509410
	132303	274505			246605	491410
					123302	450909
					611112	804616
	374407	996320			1.58223e+06	3.19506e+06
	183604	589512			694814	1.21322e+06
	63001.3	207904
	49501	102602			91801.8	279906
	162903	598512			199804	439209
	181804	338407			202504	393308
	44100.9	209704			135003	366307
	226805	384308			140403	233105
	277206	608412			298806	792016
	232205	397808			291606	605712
	228605	757815			121502	228605
	233105	774015			84601.7	463509
	166503	283506			445509	1.28073e+06
	177304	435609			171003	218704
	119702	253805			299706	659713
	140403	208804			136803	360907
	156603	292506			124202	336607
	86401.7	173703			414908	1.31493e+06
	198904	690314			117902	363607
	201604	294306			205204	837017
					276306	851417
	159303	513010			164703	355507
	386108	1.08542e+06			409508	1.48233e+06
	1.29243e+06	2.55605e+06			147603	686714
	225905	342007			487810	909018
	451809	755115			48601	186304
	622812	993620			82801.7	218704
	78301.6	365407			271805	702014
	84601.7	302406			248405	665113
	117902	245705			876618	1.90444e+06
	172803	518410			260105	402308
	75601.5	211504			270005	618312
	73801.5	159303			232205	724514
	125103	203404			263705	779416
	100802	215104
	136803	223204			114302	432909
	215104	270005			580512	1.63443e+06
	57601.2	185404			226805	675914
	129603	239405			41400.8	503110
	213304	468009			189004	430209
	756915	1.34283e+06			127803	334807
	230405	355507			65701.3	145803
	383408	883818			438309	1.15202e+06
	152103	297006			411308	914418
	132303	235805			127803	199804
	162903	298806			64801.3	231305
	238505	407708			375308	1.08632e+06
	142203	210604			87301.7	325807
					259205	274505
					70201.4	165603
					438309	613812
					89101.8	281706
					97201.9	220504
					156603	423008
					126003	721814
					1.12772e+06	1.95754e+06
					1.04942e+06	2.75226e+06
	309606	912618			84601.7	296106
	171003	683114
	76501.5	520210
	72001.4	235805
	169203	511210
	69301.4	104402
	81901.6	419408			65701.3	382508
	108002	318606			324906	833417
	112502	263705			93601.9	341107
	81001.6	201604			539111	1.35543e+06
	178204	581412			525611	1.13492e+06
	147603	461709			385208	1.06472e+06
	188104	884718			454509	900918
	134103	553511			230405	283506
	291606	1.05482e+06			179104	429309
	226805	529211			94501.9	680414
	385208	1.27263e+06			247505	580512
					113402	299706
					43200.9	899118
					214204	458109
					171903	810016
					52201	279006
					94501.9	198004
					77401.5	168303
					68401.4	191704
					53101.1	181804
	284406	840617			40500.8	241205
	150303	344707			164703	659713
	94501.9	391508			56701.1	183604
	122402	285306			70201.4	196204
	738015	1.85764e+06			75601.5	156603
	140403	304206			310506	1.00802e+06
	189904	510310			90001.8	267305
	83701.7	479710			48601	79201.6
	379808	1.19072e+06			135003	434709
	144003	589512			351907	1.00712e+06
	81001.6	275406			115202	404108
					76501.5	213304
					85501.7	300606
	91801.8	237605
	252905	702914
	433809	1.09172e+06			251105	343807
	134103	661513			160203	374407
	122402	409508			186304	504910
	126003	499510			199804	370807
	926119	1.54983e+06			315006	743415
	156603	793816			168303	306006
	216904	1.35363e+06			329407	775816
	100802	436509			131403	425709
	115202	575112			255605	500410
	375308	1.30683e+06			158403	276306
	354607	864917			278106	682214
	324006	1.01702e+06			56701.1	342907
	130503	548111			147603	324906
	351007	960319			319506	782116
	509410	1.49313e+06			95401.9	278106
	306006	1.20692e+06			112502	216904
	342907	1.16282e+06
	855017	1.42113e+06			256505	558911
	152103	461709			456309	749715
	210604	493210			225905	622812
	189004	674113			194404	475210
	150303	622812			128703	432909
					124202	223204
					115202	172803
					50401	209704
					103502	134103
					109802	252005
					152103	283506
					102602	262805
					78301.6	227705
					141303	237605
					315006	900018
					173703	659713
	412208	1.02512e+06			38700.8	180904
	441909	824416			29700.6	173703
	356407	879318			45900.9	125103
	140403	571511			11700.2	325807
	523810	1.09712e+06			24300.5	234905
	234005	487810			43200.9	206104
	234905	500410			33300.7	319506
	190804	317706			31500.6	302406
	178204	427509			96301.9	343807
	216904	380708			61201.2	250205
	222304	862217			48601	217804
	413108	952219			66601.3	233105
	398708	968419			47701	256505
	695714	1.45623e+06			37800.8	263705
	446409	999920			64801.3	311406
	331207	814516
	208804	423008
	334807	978320			679514	1.66413e+06
	482410	1.05122e+06			250205	792016
	198004	351907			63901.3	502210
	189904	300606			516610	1.23482e+06
	408608	1.04312e+06			119702	465309
					232205	1.07732e+06
					295206	916218
					101702	952219
					380708	1.44453e+06
					334807	957619
					279906	1.08632e+06
	168303	504010			210604	1.10612e+06
	152103	278106			69301.4	490510
	107102	246605			108902	704714
	147603	353707			147603	1.12412e+06
	306006	741615			139503	611112
					503110	1.86574e+06
					302406	1.11512e+06
					195304	629113
					191704	453609
					216904	472509
					204304	1.34013e+06
					97201.9	432909
					134103	268205
					288006	722714
					136803	371707
					102602	182704
					68401.4	273605
					83701.7	277206
					154803	214204
					148503	420308
					173703	408608
	456309	1.34913e+06			198004	563411
	232205	1.64523e+06			88201.8	272705
	161103	845117			132303	423008
	17100.3	617412			162003	286206
	72901.5	378908			179104	693014
	89101.8	432909			99902	553511
	381608	1.01432e+06			102602	296106
	256505	1.11242e+06			123302	234905
	228605	740715			129603	333007
	195304	372607			82801.7	232205
	543611	1.23122e+06			176404	932419
					177304	648013
					71101.4	234005
					91801.8	414908
	340207	1.24472e+06
	413108	1.13222e+06
	1.47513e+06	3.02316e+06
	345607	762315			142203	421208
	168303	368107			138603	328507
					230405	567911
					141303	462609
					64801.3	207904
					84601.7	279906
	396008	1.12142e+06			104402	212404
	590412	1.35723e+06			1.12502e+06	1.65963e+06
	363607	1.56603e+06			227705	566111
	63001.3	394208			289806	713714
	999920	1.87564e+06			490510	917118
	1.22762e+06	2.22214e+06			47701	266405
	90901.8	357307			148503	369007
	285306	623712			96301.9	184504
	273605	702914			98102	236705
	91801.8	427509			158403	253805
	136803	426609			153003	472509
	63901.3	402308			106202	277206
	597612	1.13132e+06			73801.5	228605
					296106	883818
					84601.7	286206
					854117	1.79014e+06
	50401	164703			244805	798316
	21600.4	325807			62101.2	254705
	146703	917118			330307	883818
	333907	794716			168303	518410
					119702	792916
					188104	1.07822e+06
					243005	1.04582e+06
					121502	335707
					33300.7	180004
	534611	1.19162e+06
	473409	1.45263e+06
	83701.7	421208
	165603	513010
	97201.9	335707
	431109	1.57863e+06			621012	952219
	44100.9	243005			304206	1.05302e+06
	66601.3	300606			83701.7	288006
	60301.2	223204			216004	697514
					636313	1.42293e+06
	120602	896418			116102	315006
	349207	1.45803e+06			206104	351007
	110702	316806			432009	1.03772e+06
	216004	527411			153903	332107
	135003	717314			180004	498610
	149403	712814			151203	324906
					409508	514810
					44100.9	117902
					94501.9	343807
					442809	1.32663e+06
					912618	1.45083e+06
					108002	328507
	111602	549911			169203	387008
	144003	352807			229505	382508
	123302	282606			107102	219604
	146703	1.05932e+06			135003	333007
	60301.2	926119			459909	912618
	88201.8	410408			838817	1.97554e+06
	355507	1.34913e+06			448209	846017
	101702	579612			59401.2	180904
	45900.9	394208			671413	1.20962e+06
					700214	1.14302e+06
					197104	343807
					189904	354607
					199804	371707
	641713	1.62453e+06			199804	369907
	236705	603912			382508	623712
	154803	686714			137703	386108
	186304	1.33113e+06			328507	721814
	192604	792916			59401.2	203404
	257405	951319			311406	523810
	182704	595812			355507	712814
	220504	873017			92701.9	342007
					471609	554411
					504910	635413
					311406	893718
					367207	1.14392e+06
					219604	540011
					97201.9	202504
					311406	1.10702e+06
					44100.9	314106
					69301.4	707414
	82801.7	606612			162003	711014
	90001.8	693014			252005	692114
	107102	330307
	140403	516610
	38700.8	233105			101702	199804
	89101.8	607512			62101.2	192604
	69301.4	455409			84601.7	117002
	99902	428409			129603	176404
	414908	1.74873e+06			486010	905418
	126903	740715			180904	279906
	246605	1.10252e+06			409508	619212
	135903	734415			501310	894618
	261905	1.22132e+06			343807	521110
	108002	666913			68401.4	94501.9
	371707	1.02422e+06			90001.8	175504
	131403	1.02872e+06
	63001.3	233105
	206104	888318
	41400.8	263705
	420308	1.35183e+06
	804616	2.41835e+06
	49501	990020
	283506	909018
	114302	579612
	102602	321306
	94501.9	457209
	994520	2.01064e+06
	117002	752415
	107102	432009
	232205	739815
	123302	195304			203404	320406
	191704	438309			193504	518410
	182704	740715			197104	526511
	80101.6	206104			244805	460809
	63901.3	204304			148503	241205
	92701.9	468009			137703	597612
	90001.8	557111			289806	546311
	114302	369007			240305	794716
	293406	942319			148503	637213
	873017	1.94494e+06			436509	736215
	124202	1.12772e+06			262805	510310
	407708	2.39315e+06			134103	397808
					238505	466209
					492310	751515
					372607	857717
					285306	511210
	397808	1.86484e+06			378908	631813
	153003	504010			279906	759615
	95401.9	724514			138603	581412
	228605	1.30233e+06			209704	545411
	196204	764115			407708	747015
	207004	773115			142203	405908
	227705	844217			72001.4	219604
	111602	426609			70201.4	175504
	168303	278106			328507	945019
	121502	403208			108002	350107
	140403	216904			88201.8	562511
	109802	627313			81901.6	216904
					67501.4	153003
					252005	729915
					296106	638113
					77401.5	515710
	73801.5	644413			83701.7	412208
	108002	853217			526511	1.18712e+06
	269105	1.42113e+06			91801.8	242105
	223204	1.10702e+06			211504	517510
	329407	761415			83701.7	215104
	299706	757815			310506	1.11782e+06
	429309	1.12142e+06			144003	450909
	156603	748815			375308	959419
	248405	829817			120602	232205
	168303	820816			228605	687614
	379808	1.36893e+06			197104	492310
	526511	1.46883e+06			189004	776716
	823516	1.90084e+06			59401.2	159303
	177304	932419			111602	333007
	333907	970219
	115202	384308
	120602	715514
	116102	415808
	79201.6	585912
	261905	696614
	140403	587712
	621012	1.71723e+06
	215104	475210
	142203	504910
	75601.5	445509
	47701	418508
	193504	763215
	117902	333007
	271805	755115
	119702	312306
	126903	316806
	122402	546311
	237605	672313
	500410	916218
	82801.7	202504
	92701.9	385208
	116102	509410
	410408	1.04312e+06
	562511	863117
	330307	705614
	101702	159303
	87301.7	160203
	154803	306906
	135903	504010
	461709	1.08362e+06
	171903	511210
	127803	222304
	104402	387008
	115202	180004
	186304	382508
	220504	418508
	329407	638113
	200704	592212
	105302	499510
	176404	438309
	232205	414908
	162903	751515
	188104	554411
	237605	700214
	242105	919818
	130503	610212
	162903	491410
	134103	324906
	304206	575112
	93601.9	450909
	116102	454509
	184504	560711
	1.07732e+06	2.02054e+06
	573311	726315
	280806	773115
	228605	573311
	231305	821716
	152103	324906
	108002	376208
	134103	576912
	148503	329407
	235805	571511
	273605	587712
	332107	435609
	127803	270005
	139503	348307
	169203	360007
	817216	1.79104e+06
	157503	386108
	106202	242105
	320406	824416
	166503	813616
	114302	463509
	107102	212404
	226805	705614
	177304	306006
	153003	418508
	130503	477910
	117002	492310
	103502	355507
	657013	1.22582e+06
	115202	408608
	226805	437409
	277206	1.16012e+06
	115202	349207
	318606	841517
	184504	412208
	180004	508510
	320406	1.02512e+06
	330307	771315
	122402	381608
	705614	1.70553e+06
	98102	360007
	40500.8	232205
	74701.5	189004
	176404	378908
	275406	981920
	260105	526511
	420308	994520
	154803	250205
	117002	228605
	84601.7	492310
	265505	680414
	387008	863117
	681314	1.22042e+06
	143103	221404
	182704	279006
	196204	549011
	168303	425709
	106202	469809
	662413	1.41393e+06
	102602	214204
	232205	658813
	755115	1.54083e+06
	142203	536411
	290706	1.28433e+06
	162003	503110
	68401.4	342907
	1.09622e+06	2.53895e+06
	115202	341107
	151203	653413
	110702	418508
	287106	1.15922e+06
	94501.9	634513
	266405	640813
	149403	329407
	131403	414908
	85501.7	453609
	707414	1.14662e+06
	223204	436509
	304206	793816
	352807	664213
	297006	462609
	474309	1.11872e+06
	121502	769515
	84601.7	243905
	99902	495010
	263700	822600
	611100	1023300
	320400	799200
	533700	1025100
	349200	844200
	623700	1006200
	124200	317700
	216000	644400
	327600	838800
	508500	990900
	183600	574200
	243900	567900
	454500	831600
	278100	577800
	385200	1346400
	175500	737100
	156600	498600
	184500	488700
	141300	357300
	87300	669600
	99900	557100
	176404	824416
	52201	201604
	152103	400508
	123302	531911
	295206	1.38153e+06
	360907	996320
	59401.2	412208
	244805	1.03322e+06
	626413	1.55523e+06
	183604	544511
	517510	1.17362e+06
	387008	1.11962e+06
	295206	1.11872e+06
	272705	782116
	445509	1.42473e+06
	615612	1.54443e+06
	201604	739815
	518410	1.48053e+06
	162903	351007
	369007	868517
	207904	641713
	882018	1.41213e+06
	118802	318606
	417608	1.25733e+06
	257405	410408
	226805	562511
	151203	327607
	115202	296106
	73801.5	299706
	234905	436509
	103502	350107
	173703	316806
	191704	432009
	542711	1.48773e+06
	275406	664213
	243005	768615
	389708	1.12322e+06
	157503	477010
	168303	442809
	99002	134103
	187204	396908
	57601.2	263705
	144003	333907
	71101.4	353707
	33300.7	487810
	186304	711014
	99902	416708
	105302	626413
	189904	1.20152e+06
	60301.2	281706
	63901.3	288006
	52201	642613
	38700.8	540011
	168303	1.11062e+06
	92701.9	626413
	140403	899118
	119702	952219
	80101.6	548111
	91801.8	289806
	108002	1.22312e+06
	54001.1	641713
	222304	1.79104e+06
	147603	1.25553e+06
	97201.9	577812
	150303	542711
	92701.9	791116
	95401.9	493210
	88201.8	561611
	65701.3	954019
	39600.8	502210
	342907	1.01612e+06
	431109	1.79374e+06
	492310	1.24202e+06
	261905	765015
	112502	687614
	69301.4	388808
	138603	423008
	617412	1.98634e+06
	107102	468909
	65701.3	445509
	136803	936919
	36000.7	415808
	65701.3	370807
	41400.8	318606
	101702	797416
