# Supplementary material for: Environmental enrichment enhances patterning and remodeling of synaptic nanoarchitecture as revealed by STED nanoscopy
Source: eLife. 2022 Feb 23;11:e73603. doi: 10.7554/eLife.73603 (PMC8903838; doi:10.7554/eLife.73603)
Supplement: Figure 3—source data 1. [file elife-73603-fig3-data1.xlsx]

## Sheet: Data
	t=0			t=30min			t=60min			t=120min				t=0			t=30min			t=60min			t=120min
Enrichment	PSD95_EE_t0 (nm^2)	spine_EE_t0 (nm^2)		PSD95_EE_t30 (nm^2)	spine_EE_t30 (nm^2)		PSD95_EE_t60 (nm^2)	spine_EE_t60 (nm^2)		PSD95_EE_t120 (nm^2)	spine_EE_t120 (nm^2)		Control	PSD95_CTR_t0 (nm^2)	spine_CTR_t0 (nm^2)		PSD95_CTR_t30 (nm^2)	spine_CTR_t30 (nm^2)		PSD95_CTR_t60 (nm^2)	spine_CTR_t60 (nm^2)		PSD95_CTR_t120 (nm^2)	spine_CTR_t120 (nm^2)
	539111	1.62543e+06		198904	1.93594e+06									148503	261005		117002	153903
	55801.1	390608												112502	255605		52201	167403
	329407	1.21682e+06		150303	1.27263e+06									246605	959419		237605	959419
	811816	1.48773e+06		396908	1.34733e+06									161103	968419		79201.6	1.07732e+06
	90901.8	584112		30600.6	578712									216004	542711		141303	453609
	45900.9	546311												44100.9	163803		22500.5	221404
	63901.3	445509												81901.6	308706		126003	250205
	89101.8	765015		37800.8	453609									559811	1.24022e+06		231305	946819
	134103	420308		72901.5	266405									458109	964819
	102602	1.31763e+06		12600.3	1.10162e+06									178204	627313		83701.7	517510
	66601.3	650713		26100.5	491410									351907	1.08452e+06		333907	1.17542e+06
	317706	584112		179104	464409									592212	1.30593e+06		382508	1.33293e+06
	59401.2	281706												122402	289806		76501.5	296106
	69301.4	290706												116102	400508		102602	506710
	166503	502210												721814	1.35273e+06		492310	1.16282e+06
														233105	446409		155703	601212
	60301.2	440109		39600.8	300606									289806	634513		130503	638113
	130503	286206		61201.2	304206									140403	290706		104402	306906
	325807	1.04492e+06		195304	1.28073e+06									295206	391508		151203	335707
	124202	459909		87301.7	501310									187204	343807		159303	317706
	153903	588612		101702	549911									68401.4	246605		36900.7	234905
	67501.4	336607		39600.8	354607									76501.5	361807		25200.5	247505
	138603	411308		79201.6	645313									67501.4	405008		58501.2	231305
	150303	452709		81901.6	500410									65701.3	291606
	124202	512110		78301.6	596712
	125103	506710		72001.4	472509
														523810	1.79824e+06		287106	1.70283e+06
	665113	1.87924e+06		420308	1.94044e+06		279006	2.04124e+06						757815	1.15742e+06		482410	1.32573e+06
	143103	610212		126003	474309		96301.9	665113						378008	1.05752e+06		125103	1.15742e+06
	533711	1.13402e+06		298806	1.08182e+06		414908	2.18434e+06						372607	1.10972e+06		193504	851417
	78301.6	368107		66601.3	430209									635413	1.21772e+06		437409	1.26273e+06
	231305	756015		191704	731715		131403	799216						696614	1.55883e+06		461709	1.65873e+06
	119702	501310		138603	416708		63901.3	525611						130503	441909
	261005	1.01972e+06												167403	417608		102602	410408
	37800.8	564311		17100.3	460809		11700.2	627313						196204	346507		107102	296106
	82801.7	372607		74701.5	397808		29700.6	432909						135003	296106		97201.9	284406
	79201.6	1.01702e+06		67501.4	1.23932e+06									531911	880218		84601.7	406808
	90001.8	229505		40500.8	231305		36900.7	213304						181804	414008		91801.8	703814
	79201.6	346507					26100.5	413108						252905	535511		84601.7	801016
	56701.1	177304		25200.5	204304									986420	1.52913e+06		366307	1.38153e+06
	133203	620112		92701.9	676814		66601.3	1.02512e+06						63901.3	281706		33300.7	223204
	170103	606612		90901.8	507610									158403	462609
	209704	569711		108902	563411									248405	378908		155703	396908
	160203	619212		115202	696614		72901.5	687614						315906	677714		216004	527411
	65701.3	312306		36900.7	498610									78301.6	250205
	103502	638113		61201.2	370807									60301.2	182704
	295206	1.51473e+06		315906	1.28163e+06									142203	332107		92701.9	279006
	374407	1.51473e+06		450009	2.19154e+06		347407	2.07904e+06						160203	444609		106202	382508
	35100.7	263705		29700.6	244805									237605	602112
	99002	422108		73801.5	504910		47701	502210						440109	1.04852e+06
														1.46703e+06	1.94854e+06		850517	1.61013e+06
														135903	385208		41400.8	211504
														920718	2.10964e+06		564311	1.97374e+06
														702014	1.57683e+06		587712	1.42383e+06
														425709	869417		307806	815416
	72901.5	459909		63001.3	544511		18900.4	466209						351007	708314		188104	891018
	99002	810016		69301.4	750615		33300.7	666013						51301	191704
	36000.7	264605		27000.5	249305									134103	361807		81001.6	350107
	201604	510310												104402	404108
	354607	417608		241205	749715		165603	448209						67501.4	215104
	576012	1.17362e+06		466209	1.20422e+06		396908	1.09982e+06						403208	1.01522e+06
	206104	464409		183604	522010		125103	1.04402e+06						562511	1.23482e+06
	132303	260105		117002	288006		80101.6	407708						601212	863117
	171903	866717		116102	576912		65701.3	697514						265505	748815
	204304	289806		125103	258305		128703	337507						105302	203404
	96301.9	422108												428409	1.02782e+06
	284406	700214		214204	712814		153003	771315						360907	756015
	169203	515710		117902	467109		101702	433809
	346507	631813
	278106	648013		174603	629113		126003	640813
	126903	594912		115202	398708		72001.4	547211
	140403	303306		101702	402308									222304	896418		227705	1.07462e+06
	155703	395108					127803	529211						47701	194404		24300.5	250205
	324006	985520		236705	1.04312e+06		242105	1.10342e+06						711014	1.22942e+06		567011	1.32573e+06
	108002	488710		66601.3	495010									336607	841517		460809	860417
														182704	892818		153003	805516
														378908	951319		325807	886518
														150303	488710		114302	839717
														252005	1.30863e+06		191704	1.16012e+06
	229505	435609		180904	581412
	99902	477010		66601.3	477910									135903	254705		84601.7	121502
	138603	403208		156603	871217									241205	526511		106202	396008
	74701.5	237605												132303	207904		54001.1	312306
	89101.8	279006												243005	539111		153903	510310
	78301.6	126903												74701.5	297006		59401.2	223204
	200704	866717		81901.6	1.15292e+06									144903	311406		131403	349207
	111602	867617		68401.4	811816									207904	414008		115202	345607
	75601.5	497710												225905	600312		171903	973819
	87301.7	696614		84601.7	466209									84601.7	414008		71101.4	442809
	75601.5	446409		54901.1	387908									97201.9	261905		44100.9	184504
	155703	594912												152103	445509		126003	341107
	322206	1.05482e+06		243905	813616									128703	294306		77401.5	239405
	107102	397808		84601.7	282606									647113	2.15284e+06		459009	2.33735e+06
	136803	546311		121502	243005									171003	498610		169203	710114
	152103	459009		89101.8	414908									314106	578712		207904	720014
	160203	630913		189904	526511									223204	369907
														1.32933e+06	1.61913e+06		965719	1.51293e+06
														84601.7	243005		61201.2	318606
														220504	817216		224104	1.13132e+06
														87301.7	381608		48601	324006
	219604	1.08812e+06		263705	1.40853e+06		378908	1.35093e+06						170103	389708
	56701.1	584112		62101.2	621912		86401.7	810016						100802	340207		65701.3	242105
	26100.5	540011		65701.3	562511		84601.7	848717						89101.8	294306		38700.8	171903
	197104	631813		244805	756015		331207	1.01162e+06						246605	634513		146703	394208
	64801.3	414908		100802	394208		116102	515710						72001.4	156603		134103	492310		32400.6	218704
	90901.8	376208					127803	612012						170103	292506		107102	509410		128703	425709
	85501.7	549911		115202	554411		123302	748815						665113	1.66233e+06		562511	1.57323e+06		360907	1.32753e+06
	261905	794716		357307	980120		473409	1.56423e+06						182704	385208		136803	324006		30600.6	282606
	136803	851417		142203	904518		228605	946819						183604	305106		103502	368107		89101.8	467109
	99902	594912		80101.6	624612		143103	758715						192604	251105		118802	346507		103502	278106
	59401.2	251105		76501.5	226805		83701.7	213304						203404	714614		205204	664213		135903	422108
	34200.7	388808		53101.1	327607		94501.9	400508						387908	1.10072e+06		289806	742515		295206	945019
	49501	692114		120602	520210		142203	799216						90001.8	301506		54901.1	194404		13500.3	216904
	98102	355507		86401.7	718214		135003	738015
	19800.4	367207		34200.7	246605		86401.7	259205
	294306	1.07102e+06		322206	909018		378908	1.09532e+06
	144903	519310		128703	405908		198904	558011						207004	405908		153903	369007		132303	502210
	115202	402308		144003	370807		165603	546311						135003	228605		90001.8	247505		57601.2	162903
	464409	1.53723e+06		529211	1.68033e+06		594912	1.95574e+06						106202	223204		36000.7	305106		10800.2	384308
	70201.4	478810		46800.9	350107		119702	565211						137703	253805		80101.6	245705		47701	165603
	102602	822616		77401.5	779416		127803	953119						297006	532811		227705	427509		163803	271805
	19800.4	236705		19800.4	325807		42300.8	305106						93601.9	169203		79201.6	168303		50401	108902
	584112	1.22852e+06		396008	1.10342e+06		650713	958519						298806	844217		243905	495910		168303	521110
	371707	1.01612e+06		459009	1.07552e+06		530111	1.04402e+06						365407	673213		306906	725415		144903	518410
	390608	1.50393e+06		410408	1.60383e+06		886518	1.73523e+06						95401.9	320406		66601.3	349207		48601	284406
	33300.7	377108		19800.4	225004		79201.6	338407						161103	271805		121502	223204		81001.6	172803
	115202	854117		140403	746115		206104	1.00892e+06						576012	677714		406808	724514		269105	579612
	83701.7	657013		73801.5	667813		151203	848717						336607	823516		188104	743415		138603	499510
	29700.6	349207		46800.9	360907		67501.4	439209						334807	508510		197104	563411		201604	244805
	131403	540011		141303	573311		213304	855917						253805	454509		210604	441909		134103	434709
	45900.9	373507		52201	255605		72901.5	342907						162903	187204		144903	186304
	316806	2.03314e+06		322206	2.18254e+06									401408	795616		235805	604812		180004	547211
	98102	638113		145803	519310									426609	639913		415808	663313
	249305	903618		270005	1.11872e+06		332107	1.45533e+06						102602	147603		92701.9	168303
	119702	616512		177304	702014		144003	765015						81001.6	124202		64801.3	94501.9		43200.9	119702
	51301	505810					64801.3	601212
	68401.4	413108		64801.3	440109		90001.8	622812						203404	818116		327607	822616		140403	719114
	108002	509410		145803	427509		115202	501310						37800.8	244805		51301	267305		14400.3	321306
	155703	578712		144903	871217									117002	501310		194404	513910		35100.7	519310
	126003	242105		79201.6	231305									36000.7	1.13942e+06		137703	1.37523e+06		43200.9	1.29693e+06
	190804	509410		187204	667813									202504	585012		265505	599412		200704	716414
	90901.8	231305		72901.5	247505									33300.7	661513		87301.7	400508		45900.9	524710
	106202	347407		104402	386108									10800.2	223204		21600.4	207004
	126903	404108		140403	630013									76501.5	819916		136803	638113		36000.7	666013
	534611	1.66413e+06		431109	1.89274e+06									227705	1.04762e+06		317706	826217		297006	854117
	73801.5	195304		34200.7	199804									38700.8	378908
	173703	374407		174603	452709									134103	511210
	153003	345607												138603	721814		165603	558011		125103	508510
	439209	1.30593e+06		329407	806416									114302	1.24832e+06		189904	946819		90901.8	1.25463e+06
	157503	441009		110702	435609
	286206	1.20422e+06		262805	1.13042e+06
	124202	305106		73801.5	245705
	148503	308706
	481510	973819
	190804	534611		189904	659713
	191704	473409
	258305	1.08452e+06
	481510	1.11962e+06		408608	1.30593e+06
	446409	777616		347407	849617
	342007	835217		272705	648013									86401.7	389708		172803	614712
														53101.1	240305		52201	211504		19800.4	378008
														270905	522910		282606	504010		146703	837917
														22500.5	490510
														39600.8	304206		59401.2	272705		12600.3	303306
														56701.1	285306		85501.7	249305		59401.2	307806
														83701.7	431109		54901.1	282606		65701.3	368107
														207004	1.03142e+06		204304	805516		134103	1.03502e+06
														138603	801016		143103	748815		75601.5	657913
	369907	525611		158403	507610		288906	599412						44100.9	297906		45900.9	295206		15300.3	192604
	91801.8	205204		47701	110702		50401	130503						59401.2	318606		86401.7	342007		42300.8	373507
	146703	624612		75601.5	537311		96301.9	422108						80101.6	463509		98102	431109		36000.7	445509
	147603	473409		157503	432909		195304	536411						441909	1.04672e+06		623712	1.03862e+06		373507	1.23752e+06
	124202	193504		98102	224104		89101.8	193504						56701.1	225004		63901.3	164703		39600.8	208804
	152103	306006		95401.9	185404		99902	179104						94501.9	382508		70201.4	307806		23400.5	224104
	193504	762315		172803	665113		103502	546311						98102	396908		108002	272705		52201	454509
	404108	1.00352e+06		142203	711914		201604	945919						55801.1	696614		81001.6	524710		72001.4	518410
	48601	144903		25200.5	315006		11700.2	139503						78301.6	527411		142203	560711		41400.8	468909
	124202	339307		81001.6	216904		126003	254705						200704	549911		267305	748815		240305	740715
	102602	199804		109802	346507		145803	364507						53101.1	259205		83701.7	267305
	138603	284406		86401.7	243005		147603	462609						196204	676814		302406	811816
	249305	959419		158403	702014		281706	822616						54901.1	407708		56701.1	234905		54001.1	280806
	559811	1.50933e+06		351007	1.40133e+06		355507	1.43823e+06						63001.3	616512		96301.9	606612		118802	593112
	1.01342e+06	1.67133e+06		589512	1.81084e+06		697514	1.89634e+06						67501.4	581412		71101.4	601212
	219604	373507												68401.4	304206		78301.6	209704		81001.6	237605
	504910	1.24202e+06		405908	1.17362e+06		593112	1.39503e+06						109802	412208		124202	464409		65701.3	473409
	199804	440109		169203	531911		189904	497710
	258305	637213		210604	837917		290706	731715
	115202	220504		80101.6	281706		94501.9	229505						475210	866717		164703	1.33563e+06
	185404	623712		187204	966619									55801.1	300606
	126003	367207		126903	578712									530111	887418		126003	707414
	211504	361807		162903	772215									355507	684914		144003	578712
	113402	215104		81901.6	388808		41400.8	277206						54901.1	210604		17100.3	170103
														64801.3	188104		25200.5	213304
														196204	728115
														222304	501310		112502	423908
														302406	1.19342e+06		399608	1.86934e+06		486010	1.60653e+06
	491410	1.12592e+06		576912	1.08902e+06		580512	1.12772e+06						203404	687614		131403	619212		158403	774915
	181804	495010		151203	485110		187204	330307						770415	1.77214e+06		716414	1.31403e+06		568811	1.43283e+06
	166503	428409		135903	239405		150303	326707						124202	337507		100802	449109		86401.7	490510
	68401.4	354607		31500.6	218704		31500.6	305106						232205	465309		264605	737115		221404	745215
	77401.5	303306		122402	295206		137703	430209						138603	345607		134103	333007		120602	414908
	447309	926119		441009	806416		287106	764115						265505	831617		319506	780316
	130503	303306		71101.4	349207		89101.8	432009						378908	1.64523e+06		686714	1.63713e+06
	108002	512110												54901.1	484210		72901.5	369007
	373507	2.22304e+06		607512	2.18794e+06		666013	2.14384e+06						95401.9	507610		184504	791116		66601.3	791116
	85501.7	442809												81001.6	564311		225905	544511
	86401.7	464409		87301.7	375308		81001.6	630913						44100.9	548111		53101.1	253805		63001.3	180904
	114302	329407		76501.5	234905		76501.5	237605
	438309	2.05924e+06		471609	1.78834e+06
	100802	200704												262805	626413		266405	539111		288906	841517
	146703	401408		70201.4	432009		96301.9	618312						130503	310506		131403	264605		81001.6	226805
	175504	281706		116102	142203		134103	275406						389708	836117		495010	1.04132e+06		430209	1.12142e+06
	91801.8	201604		87301.7	144003		101702	281706						121502	260105		128703	310506		167403	453609
	92701.9	225905												174603	301506		326707	399608		273605	712814
	324906	771315		369007	682214		455409	1.18442e+06						170103	256505		144903	187204		184504	393308
														126003	232205		161103	322206		180004	486010
														286206	702914		297006	398708		202504	851417
														135003	347407		229505	363607		203404	605712
														40500.8	157503		33300.7	136803
														164703	380708		293406	392408		170103	825317
														114302	535511		207004	660613		115202	779416
														141303	669613		151203	795616		196204	843317
														90901.8	224104		93601.9	236705		94501.9	323106
	69301.4	367207		72901.5	342007		25200.5	513010						220504	793816		207004	870317		331207	824416
	164703	657013		109802	524710		154803	725415						124202	342007		128703	268205		133203	597612
	262805	702914		149403	630913		186304	818116						192604	701114		174603	724514		213304	1.07642e+06
	258305	549911		281706	774915		266405	899118						72001.4	260105		108002	216904		96301.9	389708
	122402	339307		180904	483310		158403	480610						189904	865817		297006	790216		272705	1.18892e+06
	99902	371707		111602	477910		114302	604812						49501	234005		56701.1	406808		40500.8	317706
	127803	434709		174603	765015		246605	893718						238505	538211		135003	294306
	183604	1.27893e+06		354607	1.68843e+06		342007	1.73163e+06						122402	502210		152103	594012		162903	754215
	36900.7	458109		30600.6	362707		87301.7	621912						44100.9	216904		48601	283506		47701	362707
	102602	489610		66601.3	317706		57601.2	369007						52201	431109		85501.7	354607		171003	428409
	144903	1.65243e+06		332107	1.73973e+06		569711	1.58943e+06						161103	623712		188104	836117		216004	727215
	158403	969319		210604	872117		283506	1.05572e+06						518410	1.77214e+06		594912	1.03052e+06		909918	2.03584e+06
	194404	882918		117902	911718		156603	886518
	117902	853217		325807	1.27713e+06		252905	1.39593e+06
	161103	571511		184504	1.08182e+06		255605	1.40583e+06						207004	375308		295206	423908
	302406	1.50483e+06		367207	1.81444e+06		306906	1.57323e+06						405908	780316		438309	952219		366307	988220
	157503	343807		60301.2	343807									63001.3	147603		50401	248405		45900.9	369907
	324906	758715		299706	936919		288906	1.06922e+06						71101.4	359107
	331207	790216		334807	1.12052e+06		347407	1.36083e+06						110702	285306
	162903	463509		161103	474309		132303	417608						215104	308706		329407	436509		247505	718214
														142203	305106		127803	249305		80101.6	253805
														95401.9	182704		46800.9	182704		27900.6	520210
														138603	334807		127803	261005		75601.5	239405
														57601.2	194404
														84601.7	244805
														89101.8	218704		72001.4	152103
														68401.4	217804		89101.8	193504
														248405	839717		260105	753315		258305	702914
	151203	717314												243005	470709		247505	376208
	653413	1.24292e+06												149403	416708		139503	497710
	197104	392408												84601.7	156603		64801.3	126903
	119702	221404												437409	1.22582e+06		430209	1.17902e+06		394208	1.47513e+06
	970219	1.75864e+06												379808	1.11602e+06		330307	1.38333e+06		284406	1.37253e+06
	241205	693914												91801.8	624612		91801.8	450909		79201.6	775816
	132303	348307												126003	198004		103502	218704
	145803	251105												70201.4	228605		62101.2	258305
	195304	280806												140403	431109		92701.9	806416
	96301.9	176404												297906	1.34553e+06		320406	1.36533e+06		235805	805516
	172803	686714												243905	1.28523e+06		166503	1.11062e+06
	105302	333007												366307	732615		369007	848717
	158403	270905												127803	433809		117002	648013
	355507	584112												169203	525611		246605	595812		274505	811816
	177304	315006												212404	425709		286206	450909
	488710	926119												164703	434709		106202	252005		109802	344707
	163803	185404
	62101.2	203404
	129603	381608												251105	420308		194404	298806
	117002	243905												173703	616512		209704	800116
	105302	282606												148503	402308		139503	356407
	162003	464409												345607	861317		210604	695714
	118802	227705												80101.6	396008		95401.9	391508
	158403	405908												217804	610212		264605	600312
	144003	273605												242105	785716		235805	756915
	107102	198004												99902	313206		74701.5	342007
	153003	224104												85501.7	243905		74701.5	368107
	149403	289806												163803	245705		124202	245705
	284406	363607												256505	361807		207904	647113
	115202	321306												548111	979220		493210	1.13582e+06
														111602	239405		69301.4	219604
														103502	330307		53101.1	283506
														127803	216004		106202	253805
														90901.8	177304		86401.7	191704
														190804	375308		168303	351007
														397808	794716		310506	650713
														146703	246605		140403	212404
														105302	224104		67501.4	159303
	302406	332107												222304	881118		241205	995420
	322206	665113												288906	919818		228605	743415
	490510	610212
	219604	435609
	242105	417608												86401.7	1.01522e+06
	215104	476110												30600.6	493210					13500.3	325807
	336607	556211												111602	748815					57601.2	257405
	166503	306006												227705	780316					228605	829817
	74701.5	359107												133203	594012					69301.4	508510
	157503	230405												57601.2	423908					74701.5	404108
	455409	1.32303e+06												74701.5	283506					51301	223204
	99002	819016												260105	1.03412e+06					207004	950419
	208804	309606												513010	2.09704e+06					360907	1.92154e+06
	268205	490510												794716	1.47873e+06					630913	1.46703e+06
	161103	282606												500410	1.48233e+06
	31500.6	194404												65701.3	152103					38700.8	148503
	190804	326707												82801.7	381608					72901.5	286206
	382508	554411												160203	238505					66601.3	233105
	189004	245705												142203	642613					143103	488710
	168303	622812												54001.1	186304
														625513	2.11774e+06
														606612	1.15022e+06
														58501.2	252005					45000.9	138603
														144903	333007					92701.9	430209
														229505	846017					240305	887418
														312306	856817					137703	866717
														1.26633e+06	2.38685e+06					855017	2.42285e+06
														90001.8	309606					85501.7	394208
	183604	635413
	264605	405908
	174603	471609
	111602	376208												222304	621912
	90001.8	337507												77401.5	199804					85000	171000
	120602	198004												87301.7	287106					89000	175000
	302406	859517												113402	417608					155000	439000
	501310	798316												1.73973e+06	4.9663e+06					2.027e+06	4.095e+06
	115202	454509												1.43643e+06	2.30765e+06
	153003	324906												559811	1.15112e+06
	154803	445509
														215104	904518					240305	1.06652e+06
	195304	292506												575112	945019					390608	951319
	68401.4	112502		78301.6	146703		54901.1	132303						624612	963919					425709	925219
	36900.7	315006		27900.6	257405									137703	448209					135903	370807
	168303	355507		179104	312306		147603	378908						463509	1.13762e+06					270005	1.11152e+06
	122402	234905		79201.6	215104		102602	270905						108002	391508					385208	995420
	140403	332107												1.45083e+06	2.71175e+06					1.25283e+06	2.63525e+06
	125103	276306		103502	428409									301506	780316					350107	1.21052e+06
	122402	243905		97201.9	200704		117002	359107						143103	312306					144903	338407
	263705	539111		259205	486010		192604	397808						46800.9	381608					77401.5	214204
	109802	367207		60301.2	163803		72001.4	391508						62101.2	291606					90001.8	279006
	148503	372607		157503	462609		94501.9	365407
	186304	474309		111602	538211		157503	471609
	96301.9	418508		57601.2	225905		27900.6	270905
	243905	721814		197104	595812		216004	700214
	142203	319506		122402	387008		127803	391508						121502	499510					120602	434709		81900	470700
	263705	789316		158403	558011		176404	790216						165603	570611					171903	469809		81000	388800
	153003	279006		72001.4	250205		46800.9	316806						151203	489610					169203	437409		104400	459900
	189004	394208		169203	420308									173703	639013					273605	431109		108000	392400
	159303	361807		106202	356407									313206	1.41033e+06					324006	1.09622e+06		288000	874800
	345607	704714		289806	828017		252905	913518						195304	583212					165603	830717
	153903	316806		108002	212404		72001.4	387008						111602	341107					112502	191704		54000	320400
	113402	350107												59401.2	509410					72001.4	346507
	132303	274505		105302	263705									246605	491410					184504	660613		108900	778500
														123302	450909								49500	276300
														611112	804616					547211	1.15292e+06
	374407	996320												1.58223e+06	3.19506e+06					1.80814e+06	3.41917e+06
	183604	589512		253805	564311									694814	1.21322e+06					720014	1.40763e+06
	63001.3	207904		55801.1	256505
	49501	102602		33300.7	112502									91801.8	279906					67501.4	236705		118802	375308
	162903	598512												199804	439209					87301.7	960319		143103	603012
	181804	338407		142203	252905									202504	393308					180004	496810		148503	459009
	44100.9	209704		36000.7	125103									135003	366307					141303	332107		159303	512110
	226805	384308		171903	351907									140403	233105					127803	287106		205204	378008
	277206	608412		246605	646213									298806	792016					288906	726315		243005	792916
	232205	397808		214204	564311									291606	605712					215104	863117		245705	947719
	228605	757815		159303	716414									121502	228605					63901.3	222304		85501.7	252005
	233105	774015		232205	726315									84601.7	463509
	166503	283506		99002	218704									445509	1.28073e+06
	177304	435609												171003	218704								125103	373507
	119702	253805												299706	659713					153003	340207		270905	889218
	140403	208804		153003	355507									136803	360907								39600.8	271805
	156603	292506												124202	336607					47701	234905		133203	277206
	86401.7	173703		56701.1	125103									414908	1.31493e+06					274505	1.07912e+06
	198904	690314		182704	577812									117902	363607					80101.6	510310		141303	362707
	201604	294306		171903	334807									205204	837017					147603	732615		243905	994520
														276306	851417					137703	349207
	159303	513010												164703	355507					179104	410408
	386108	1.08542e+06		283506	697514									409508	1.48233e+06					434709	1.33833e+06
	1.29243e+06	2.55605e+06		810916	1.40403e+06									147603	686714					104402	632713
	225905	342007		109802	343807									487810	909018					594912	1.17992e+06
	451809	755115		271805	627313									48601	186304					56701.1	156603
	622812	993620		462609	975620									82801.7	218704					77401.5	251105
	78301.6	365407		38700.8	211504									271805	702014					217804	844217
	84601.7	302406		36000.7	180904									248405	665113					164703	694814
	117902	245705		64801.3	298806									876618	1.90444e+06					682214	1.62003e+06
	172803	518410		139503	501310									260105	402308					243905	349207
	75601.5	211504		19800.4	264605									270005	618312					264605	998120
	73801.5	159303		27900.6	176404									232205	724514					171903	801016
	125103	203404		27000.5	182704									263705	779416					202504	1.11782e+06
	100802	215104		81001.6	203404
	136803	223204		101702	254705									114302	432909					116102	380708		201604	420308
	215104	270005		193504	298806									580512	1.63443e+06					411308	1.47603e+06		637213	2.02414e+06
	57601.2	185404												226805	675914					190804	781216		252905	867617
	129603	239405		81901.6	279906									41400.8	503110					69301.4	504010		31500.6	474309
	213304	468009		117002	288006									189004	430209					103502	520210		206104	479710
	756915	1.34283e+06		630913	1.16372e+06									127803	334807					86401.7	423008		156603	531911
	230405	355507		212404	271805									65701.3	145803					71101.4	224104		67501.4	259205
	383408	883818		346507	919818									438309	1.15202e+06					450009	1.17182e+06		586812	1.05482e+06
	152103	297006		111602	209704									411308	914418					262805	984620		432909	856817
	132303	235805		83701.7	161103									127803	199804					116102	251105		156603	328507
	162903	298806		142203	222304									64801.3	231305
	238505	407708		160203	297906									375308	1.08632e+06					351007	846917		451809	990920
	142203	210604		102602	141303									87301.7	325807					29700.6	254705
														259205	274505					297006	299706		321306	723614
														70201.4	165603
														438309	613812					410408	681314		423008	954919
														89101.8	281706
														97201.9	220504					88201.8	197104		121502	279906
														156603	423008					101702	542711		192604	756915
														126003	721814
														1.12772e+06	1.95754e+06
														1.04942e+06	2.75226e+06
	309606	912618		542711	711014									84601.7	296106								95401.9	383408
	171003	683114		256505	609312
	76501.5	520210		119702	386108
	72001.4	235805
	169203	511210		221404	469809
	69301.4	104402		45900.9	158403
	81901.6	419408		121502	397808									65701.3	382508					42300.8	286206		117002	334807
	108002	318606		123302	360907									324906	833417					362707	838817		613812	972919
	112502	263705		146703	440109									93601.9	341107					27000.5	444609		197104	486010
	81001.6	201604		113402	452709									539111	1.35543e+06					576912	1.27803e+06		925219	1.51833e+06
	178204	581412		387908	698414									525611	1.13492e+06					400508	1.03952e+06		803716	1.32753e+06
	147603	461709		162903	319506									385208	1.06472e+06					273605	947719		215104	1.07192e+06
	188104	884718		361807	994520									454509	900918					347407	712814		338407	892818
	134103	553511		134103	414908									230405	283506					135903	221404		155703	261905
	291606	1.05482e+06		512110	1.33383e+06									179104	429309
	226805	529211		276306	683114									94501.9	680414					63001.3	396908		92701.9	838817
	385208	1.27263e+06		517510	1.08272e+06									247505	580512					166503	823516		277206	1.04312e+06
														113402	299706					27900.6	248405		65701.3	297006
														43200.9	899118					40500.8	691214		129603	699314
														214204	458109					196204	784816		261005	680414
														171903	810016					37800.8	869417
														52201	279006
														94501.9	198004					66601.3	222304		64801.3	180004
														77401.5	168303					50401	189004		89101.8	182704
														68401.4	191704
														53101.1	181804					45000.9	158403
	284406	840617		198904	711014									40500.8	241205					28800.6	181804
	150303	344707		163803	419408									164703	659713					189904	566111
	94501.9	391508		102602	331207									56701.1	183604					56701.1	196204
	122402	285306		129603	403208									70201.4	196204					71101.4	216004
	738015	1.85764e+06		467109	1.70913e+06									75601.5	156603					44100.9	108002
	140403	304206		79201.6	315906									310506	1.00802e+06					292506	801916
	189904	510310		152103	402308									90001.8	267305					92701.9	270005
	83701.7	479710		115202	369007									48601	79201.6					45900.9	99902
	379808	1.19072e+06		533711	1.69203e+06									135003	434709					142203	366307
	144003	589512		177304	654313									351907	1.00712e+06					324906	1.06112e+06
	81001.6	275406		39600.8	279006									115202	404108					101702	263705
														76501.5	213304
														85501.7	300606					179104	478810
	91801.8	237605		51301	278106
	252905	702914		234905	822616
	433809	1.09172e+06		175504	1.08812e+06									251105	343807					333007	369007
	134103	661513		201604	692114									160203	374407					170103	347407
	122402	409508		84601.7	356407									186304	504910					217804	336607
	126003	499510		136803	740715									199804	370807					231305	264605
	926119	1.54983e+06		796516	867617									315006	743415
	156603	793816		162903	1.09532e+06									168303	306006					172803	283506
	216904	1.35363e+06		221404	1.53723e+06									329407	775816
	100802	436509		62101.2	438309									131403	425709
	115202	575112		133203	840617									255605	500410
	375308	1.30683e+06		242105	1.60923e+06									158403	276306
	354607	864917		250205	738015									278106	682214					216004	843317
	324006	1.01702e+06		251105	829817									56701.1	342907					41400.8	178204
	130503	548111		170103	513010									147603	324906					114302	288006
	351007	960319		310506	888318									319506	782116					344707	942319
	509410	1.49313e+06												95401.9	278106					115202	300606
	306006	1.20692e+06		344707	1.11512e+06									112502	216904					97201.9	230405
	342907	1.16282e+06		271805	1.02152e+06
	855017	1.42113e+06												256505	558911
	152103	461709		183604	684914									456309	749715					468009	769515
	210604	493210		194404	689414									225905	622812					259205	504910
	189004	674113		179104	597612									194404	475210					175504	386108
	150303	622812		146703	451809									128703	432909					80101.6	179104
														124202	223204					125103	153903
														115202	172803					83701.7	189004
														50401	209704					92701.9	149403
														103502	134103					105302	143103
														109802	252005					173703	361807
														152103	283506					162003	324906
														102602	262805					74701.5	343807
														78301.6	227705					126003	255605
														141303	237605					163803	249305
														315006	900018					378008	809116
														173703	659713					249305	533711
	412208	1.02512e+06		364507	800116									38700.8	180904
	441909	824416		290706	795616									29700.6	173703
	356407	879318		219604	918918									45900.9	125103
	140403	571511		76501.5	370807									11700.2	325807
	523810	1.09712e+06		429309	1.02062e+06									24300.5	234905
	234005	487810		193504	475210									43200.9	206104
	234905	500410		147603	483310									33300.7	319506
	190804	317706		122402	207904									31500.6	302406
	178204	427509		98102	285306									96301.9	343807
	216904	380708		142203	346507									61201.2	250205
	222304	862217		143103	593112									48601	217804
	413108	952219		216004	788416									66601.3	233105
	398708	968419		250205	846017									47701	256505
	695714	1.45623e+06		457209	1.24112e+06									37800.8	263705
	446409	999920		210604	810916									64801.3	311406
	331207	814516		220504	805516
	208804	423008		133203	746115
	334807	978320		137703	897318									679514	1.66413e+06								486010	1.53273e+06
	482410	1.05122e+06		353707	719114									250205	792016
	198004	351907		126003	294306									63901.3	502210								36900.7	540911
	189904	300606		144903	441909									516610	1.23482e+06								467109	1.30593e+06
	408608	1.04312e+06		335707	918018									119702	465309								85501.7	320406
														232205	1.07732e+06
														295206	916218
														101702	952219								71101.4	1.03142e+06
														380708	1.44453e+06								252905	1.39863e+06
														334807	957619								184504	1.36083e+06
														279906	1.08632e+06								169203	1.03682e+06
	168303	504010												210604	1.10612e+06								52201	1.14392e+06
	152103	278106		68401.4	280806									69301.4	490510								36900.7	502210
	107102	246605		36000.7	342907									108902	704714								56701.1	729015
	147603	353707												147603	1.12412e+06								107102	958519
	306006	741615												139503	611112								70201.4	479710
														503110	1.86574e+06								348307	1.92154e+06
														302406	1.11512e+06								155703	628213
														195304	629113								162903	1.05572e+06
														191704	453609								145803	302406
														216904	472509								158403	500410
														204304	1.34013e+06								60301.2	1.10162e+06
														97201.9	432909								52201	511210
														134103	268205					69301.4	299706		121502	479710
														288006	722714					161103	972919		255605	933319
														136803	371707					81001.6	272705		58501.2	382508
														102602	182704					79201.6	227705		101702	243905
														68401.4	273605					19800.4	277206		68401.4	292506
														83701.7	277206					54001.1	388808		45900.9	260105
														154803	214204					94501.9	218704		103502	416708
														148503	420308					61201.2	504010		130503	520210
														173703	408608					147603	515710		149403	633613
	456309	1.34913e+06		240305	1.31943e+06									198004	563411					180004	510310		226805	820816
	232205	1.64523e+06		163803	1.53183e+06									88201.8	272705					81001.6	406808		146703	522010
	161103	845117												132303	423008					80101.6	459009		118802	534611
	17100.3	617412												162003	286206					118802	399608		162003	475210
	72901.5	378908		11700.2	284406									179104	693014					197104	833417		269105	833417
	89101.8	432909		98102	378008									99902	553511					74701.5	268205
	381608	1.01432e+06		266405	1.14212e+06									102602	296106
	256505	1.11242e+06		217804	1.25553e+06									123302	234905					123302	560711		105302	349207
	228605	740715		241205	765015									129603	333007					80101.6	487810		72901.5	253805
	195304	372607		155703	392408									82801.7	232205					72901.5	249305
	543611	1.23122e+06		330307	979220									176404	932419
														177304	648013					125103	580512		110702	651613
														71101.4	234005					42300.8	224104
														91801.8	414908					81901.6	339307		111602	387008
	340207	1.24472e+06		399608	1.23662e+06
	413108	1.13222e+06		366307	1.02152e+06
	1.47513e+06	3.02316e+06		1.15202e+06	2.61185e+06
	345607	762315		306006	545411									142203	421208					110702	173703		122402	531911
	168303	368107		144903	323106									138603	328507					73801.5	369007		98102	683114
														230405	567911					191704	471609		189904	796516
														141303	462609					83701.7	384308		83701.7	459909
														64801.3	207904					38700.8	342007		27900.6	332107
														84601.7	279906					50401	284406		60301.2	504910
	396008	1.12142e+06					433809	1.68933e+06						104402	212404					33300.7	192604		46800.9	203404
	590412	1.35723e+06					202504	1.53993e+06						1.12502e+06	1.65963e+06					825317	1.67673e+06		818116	2.38955e+06
	363607	1.56603e+06					207904	1.80274e+06						227705	566111					173703	366307		202504	608412
	63001.3	394208												289806	713714					268205	672313		268205	1.11332e+06
	999920	1.87564e+06					597612	2.07184e+06						490510	917118					360907	1.11062e+06		333007	1.36443e+06
	1.22762e+06	2.22214e+06					616512	2.52185e+06						47701	266405					30600.6	228605
	90901.8	357307					66601.3	381608						148503	369007					98102	466209		113402	417608
	285306	623712					151203	1.03232e+06						96301.9	184504					50401	153903		131403	453609
	273605	702914					166503	1.06472e+06						98102	236705					81901.6	225004		76501.5	430209
	91801.8	427509												158403	253805					79201.6	162903		136803	558911
	136803	426609					89101.8	768615						153003	472509					101702	345607		135903	557111
	63901.3	402308												106202	277206
	597612	1.13132e+06					527411	1.15382e+06						73801.5	228605					27000.5	218704
														296106	883818					451809	842417
														84601.7	286206
														854117	1.79014e+06								1.13852e+06	1.72353e+06
	50401	164703					27000	292500						244805	798316								146703	900018
	21600.4	325807												62101.2	254705								74701.5	244805
	146703	917118					135900	990900						330307	883818								379808	1.10522e+06
	333907	794716					230400	1071900						168303	518410								166503	562511
														119702	792916								172803	800116
														188104	1.07822e+06								193504	595812
														243005	1.04582e+06
														121502	335707								140403	608412
														33300.7	180004								25200.5	190804
	534611	1.19162e+06					457209	1.17092e+06		457209	1.17272e+06
	473409	1.45263e+06					531011	1.75864e+06		385208	1.56513e+06
	83701.7	421208					62101.2	604812		47701	333007
	165603	513010					159303	355507		152103	449109
	97201.9	335707					68401.4	512110		103502	432909
	431109	1.57863e+06					518410	1.88734e+06		234005	1.46523e+06			621012	952219								1.01792e+06	1.03772e+06
	44100.9	243005					9000.18	270005		18000.4	252005			304206	1.05302e+06								229505	725415
	66601.3	300606					39600.8	146703						83701.7	288006								66601.3	217804
	60301.2	223204					69301.4	243905		18900.4	340207			216004	697514								157503	897318
							72901.5	472509						636313	1.42293e+06								824416	1.44093e+06
	120602	896418					119702	954019		99002	795616			116102	315006								66601.3	226805
	349207	1.45803e+06					180904	1.71363e+06		161103	1.63533e+06			206104	351007								62101.2	361807
	110702	316806					104402	467109		102602	635413			432009	1.03772e+06								365407	821716
	216004	527411					135903	571511		184504	486010			153903	332107								181804	405008
	135003	717314					132303	641713		106202	577812			180004	498610								138603	477910
	149403	712814					119702	723614						151203	324906								91801.8	201604
														409508	514810
														44100.9	117902								50401	99002
														94501.9	343807
														442809	1.32663e+06								500410	1.35363e+06
														912618	1.45083e+06								1.07642e+06	1.50303e+06
														108002	328507
	111602	549911					140403	442809		207004	735315			169203	387008
	144003	352807					134103	333007		131403	338407			229505	382508
	123302	282606					121502	261005		79201.6	393308			107102	219604								31500.6	121502
	146703	1.05932e+06					191704	815416						135003	333007
	60301.2	926119					94501.9	907218						459909	912618								253805	800116
	88201.8	410408					79201.6	449109		61201.2	450009			838817	1.97554e+06								598512	2.65055e+06
	355507	1.34913e+06					320406	1.41213e+06		251105	1.12142e+06			448209	846017
	101702	579612					114302	398708		73801.5	429309			59401.2	180904
	45900.9	394208					45000.9	300606		40500.8	309606			671413	1.20962e+06
														700214	1.14302e+06
														197104	343807								137703	324906
														189904	354607								140403	375308
														199804	371707								140403	366307
	641713	1.62453e+06								387008	1.15922e+06			199804	369907								266405	495010
	236705	603912								142203	422108			382508	623712								318606	846917
	154803	686714								199804	649813			137703	386108								34200.7	289806
	186304	1.33113e+06								155703	985520			328507	721814
	192604	792916								14400.3	517510			59401.2	203404
	257405	951319								260105	1.03772e+06			311406	523810
	182704	595812								159303	660613			355507	712814								286206	977420
	220504	873017								203404	716414			92701.9	342007								48601	195304
														471609	554411								313206	425709
														504910	635413
														311406	893718								105302	777616
														367207	1.14392e+06								191704	1.01252e+06
														219604	540011								186304	567011
														97201.9	202504								83701.7	171003
														311406	1.10702e+06								173703	1.01072e+06
														44100.9	314106
														69301.4	707414								15300.3	511210
	82801.7	606612								68401.4	670513			162003	711014								117902	518410
	90001.8	693014								17100.3	454509			252005	692114								169203	668713
	107102	330307								84601.7	446409
	140403	516610								129603	713714
	38700.8	233105												101702	199804
	89101.8	607512												62101.2	192604
	69301.4	455409								71101.4	500410			84601.7	117002
	99902	428409								95401.9	444609			129603	176404
	414908	1.74873e+06								473409	1.60563e+06			486010	905418
	126903	740715								78301.6	587712			180904	279906
	246605	1.10252e+06								250205	1.32663e+06			409508	619212
	135903	734415								139503	817216			501310	894618
	261905	1.22132e+06								220504	1.26273e+06			343807	521110
	108002	666913								62101.2	485110			68401.4	94501.9
	371707	1.02422e+06												90001.8	175504
	131403	1.02872e+06
	63001.3	233105
	206104	888318
	41400.8	263705
	420308	1.35183e+06
	804616	2.41835e+06
	49501	990020
	283506	909018
	114302	579612
	102602	321306					70201.4	467109
	94501.9	457209					94501.9	287106
	994520	2.01064e+06					1.17992e+06	2.05294e+06
	117002	752415					126003	585012
	107102	432009					95401.9	454509
	232205	739815					333007	804616
	123302	195304												203404	320406								188104	509410
	191704	438309					153903	634513						193504	518410								281706	578712
	182704	740715					177304	880218						197104	526511								196204	528311
	80101.6	206104					98102	352807						244805	460809								209704	634513
	63901.3	204304					69301.4	251105						148503	241205								157503	481510
	92701.9	468009					126003	399608						137703	597612
	90001.8	557111					90901.8	393308						289806	546311								287106	703814
	114302	369007												240305	794716								189904	762315
	293406	942319					238505	828017						148503	637213								275406	909018
	873017	1.94494e+06												436509	736215								553511	1.07732e+06
	124202	1.12772e+06					222304	994520						262805	510310								199804	768615
	407708	2.39315e+06					481510	2.32745e+06						134103	397808								123302	576012
														238505	466209								157503	501310
														492310	751515
														372607	857717
														285306	511210								261905	730815
	397808	1.86484e+06					764115	1.92244e+06						378908	631813
	153003	504010					148503	375308						279906	759615
	95401.9	724514					138603	670513						138603	581412
	228605	1.30233e+06					300606	1.09982e+06		242105	1.28793e+06			209704	545411								298806	650713
	196204	764115					194404	847817		254705	1.05212e+06			407708	747015								356407	539111
	207004	773115					198904	758715		244805	694814			142203	405908								183604	387908
	227705	844217					201604	468009		180004	571511			72001.4	219604								92701.9	178204
	111602	426609					142203	419408						70201.4	175504								84601.7	190804
	168303	278106					212404	322206						328507	945019								245705	493210
	121502	403208					143103	296106						108002	350107								95401.9	441009
	140403	216904					148503	409508		135903	306006			88201.8	562511								71101.4	630013
	109802	627313					130503	642613						81901.6	216904								90901.8	455409
														67501.4	153003								81901.6	186304
														252005	729915								249305	548111
														296106	638113								236705	523810
														77401.5	515710								97201.9	446409
	73801.5	644413					76501.5	702014		43200.9	683114			83701.7	412208
	108002	853217					33300.7	615612		97201.9	828917			526511	1.18712e+06								182704	628213
	269105	1.42113e+06					360907	1.32483e+06		273605	1.24112e+06			91801.8	242105								70201.4	216904
	223204	1.10702e+06					179104	861317		164703	1.00712e+06			211504	517510								207904	666913
	329407	761415					261005	711014		195304	811816			83701.7	215104								105302	393308
	299706	757815					296106	813616		224104	818116			310506	1.11782e+06								409508	1.44183e+06
	429309	1.12142e+06					360007	1.15922e+06		335707	1.09352e+06			144003	450909								116102	564311
	156603	748815					144003	706514		117002	713714			375308	959419								178204	931519
	248405	829817					137703	702914		184504	589512			120602	232205								116102	449109
	168303	820816					189004	742515		113402	1.10342e+06			228605	687614								259205	552611
	379808	1.36893e+06					448209	1.18982e+06		360007	1.50573e+06			197104	492310								198004	440109
	526511	1.46883e+06					422108	1.27803e+06		328507	1.40673e+06			189004	776716								656113	2.03314e+06
	823516	1.90084e+06					632713	1.88104e+06		378908	1.89814e+06			59401.2	159303								57601.2	170103
	177304	932419					96301.9	848717		79201.6	766815			111602	333007								185404	452709
	333907	970219					288006	1.06652e+06		339307	844217
	115202	384308					110702	295206		113402	368107
	120602	715514					91801.8	645313		72001.4	483310
	116102	415808					82801.7	361807		78301.6	457209
	79201.6	585912					85501.7	464409		62101.2	439209
	261905	696614					207904	641713		210604	693914
	140403	587712					109802	548111
	621012	1.71723e+06					502210	1.32483e+06		639013	1.71813e+06
	215104	475210					180004	428409		180004	549011
	142203	504910								144003	462609
	75601.5	445509
	47701	418508					24300.5	418508
	193504	763215					177304	516610		171003	620112
	117902	333007					108902	514810		96301.9	298806
	271805	755115					313206	540011		148503	539111
	119702	312306					188104	390608		131403	345607
	126903	316806					183604	288006		73801.5	391508
	122402	546311					104402	542711		42300.8	387008
	237605	672313					248405	799216		146703	1.21682e+06
	500410	916218					546311	888318		285306	1.27443e+06
	82801.7	202504					84601.7	243905
	92701.9	385208					150303	310506		117002	395108
	116102	509410					173703	520210		120602	765915
	410408	1.04312e+06					512110	735315
	562511	863117					734415	1.40403e+06		568811	1.43013e+06
	330307	705614					584112	1.09442e+06		274505	1.16012e+06
	101702	159303					135903	174603
	87301.7	160203					27900.6	101702
	154803	306906					146703	250205
	135903	504010					194404	629113
	461709	1.08362e+06					663313	1.14482e+06		586812	1.36623e+06
	171903	511210					203404	440109
	127803	222304					54001.1	247505
	104402	387008					63001.3	285306
	115202	180004					117902	269105
	186304	382508					34200.7	252005		129603	482410
	220504	418508					120602	432009		129603	538211
	329407	638113					159303	789316		162903	447309
	200704	592212
	105302	499510					87301.7	739815
	176404	438309					161103	573311		136803	422108
	232205	414908					153003	509410		102602	308706
	162903	751515					115202	520210		126003	626413
	188104	554411					154803	1.04582e+06
	237605	700214					91801.8	414008
	242105	919818					278106	953119		272705	723614
	130503	610212					115202	426609		118802	706514
	162903	491410					129603	346507
	134103	324906					72001.4	333907
	304206	575112					169203	681314
	93601.9	450909					64801.3	549011		55801.1	441909
	116102	454509					111602	437409
	184504	560711					221404	591312		129603	477910
	1.07732e+06	2.02054e+06					784816	1.82254e+06		873917	1.95484e+06
	573311	726315					349207	680414
	280806	773115					264605	780316		191704	646213
	228605	573311					189004	531011		187204	802816
	231305	821716					171003	974719		175504	749715
	152103	324906					116102	306006		110702	544511
	108002	376208					99002	486910		138603	542711
	134103	576912					137703	596712		19800.4	623712
	148503	329407					81001.6	324906		51301	265505
	235805	571511					229505	920718		263705	711914
	273605	587712
	332107	435609
	127803	270005
	139503	348307					82801.7	257405
	169203	360007					173703	540011		122402	932419
	817216	1.79104e+06					778516	1.66863e+06		616512	1.74963e+06
	157503	386108					57601.2	379808		57601.2	354607
	106202	242105
	320406	824416
	166503	813616
	114302	463509
	107102	212404					84601.7	228605		84601.7	286206
	226805	705614					123302	943219		108002	857717
	177304	306006					106202	274505		120602	425709
	153003	418508					148503	577812		143100	565200
	130503	477910					140403	544511		99900	685800
	117002	492310					81901.6	397808		94500	781200
	103502	355507					70201.4	321306		108900	406800
	657013	1.22582e+06					672313	1.50573e+06		521100	1522800
	115202	408608					110702	436509		78300	592200
	226805	437409					165603	236705
	277206	1.16012e+06					236705	1.32033e+06		192600	1459800
	115202	349207					78301.6	363607		26100	393300
	318606	841517					227705	608412		174600	769500
	184504	412208					139503	391508		103500	856800
	180004	508510					162903	599412		153900	976500
	320406	1.02512e+06					316806	765915		296100	1145700
	330307	771315					391508	710114
	122402	381608					113402	394208
	705614	1.70553e+06					550811	1.30953e+06
	98102	360007					112502	392408
	40500.8	232205					35100.7	168303
	74701.5	189004					61201.2	171003
	176404	378908					96301.9	380708		72000	344700
	275406	981920					292506	714614		305100	978300
	260105	526511					225905	508510
	420308	994520					334807	891918		262800	1143900
	154803	250205					133203	533711
	117002	228605					83701.7	277206
	84601.7	492310					81901.6	336607		89101.8	522910
	265505	680414					225004	626413		132303	776716
	387008	863117					362707	1.10702e+06		311406	1.26723e+06
	681314	1.22042e+06					676814	961219		491410	987320
	143103	221404					130503	296106
	182704	279006					156603	683114
	196204	549011					234905	773115		192604	563411
	168303	425709					71101.4	378908
	106202	469809					67501.4	323106		7200.14	314106
	662413	1.41393e+06					455409	1.25103e+06		378008	1.21412e+06
	102602	214204
	232205	658813					118802	734415		126003	764115
	755115	1.54083e+06					552611	1.65873e+06		467109	1.47333e+06
	142203	536411					116102	442809		114302	477910
	290706	1.28433e+06					214204	1.00622e+06		179104	1.12952e+06
	162003	503110					119702	589512
	68401.4	342907					45900.9	325807		51301	383408
	1.09622e+06	2.53895e+06
	115202	341107					117902	423908		38700.8	409508
	151203	653413					116102	870317		99902	633613
	110702	418508					51301	282606		74701.5	443709
	287106	1.15922e+06					252905	921618		238505	1.02692e+06
	94501.9	634513					73801.5	614712		9000.18	589512
	266405	640813					204304	496810		174603	666913
	149403	329407					139503	470709
	131403	414908					83701.7	321306		46800.9	251105
	85501.7	453609					44100.9	396908
	707414	1.14662e+06					594912	960319
	223204	436509					153903	393308
	304206	793816
	352807	664213					307806	606612		275406	486010
	297006	462609					216904	456309
	474309	1.11872e+06					403208	862217		328507	1.06742e+06
	121502	769515					192604	446409
	84601.7	243905					68401.4	253805
	99902	495010					58501.2	378908
	263700	822600					103502	774015
	611100	1023300					413108	864017
	320400	799200					184504	855017
	533700	1025100					189904	631813
	349200	844200					135003	955819
	623700	1006200					526511	1.11332e+06
	124200	317700
	216000	644400					124202	800116
	327600	838800					197104	828017
	508500	990900
	183600	574200
	243900	567900					65701.3	698414
	454500	831600
	278100	577800					210604	548111
	385200	1346400
	175500	737100					156603	671413
	156600	498600					144003	644413
	184500	488700					160203	556211
	141300	357300					94501.9	288906
	87300	669600					132303	922518
	99900	557100					95401.9	706514
	176404	824416					153003	956719
	52201	201604					75601.5	363607
	152103	400508					127803	692114
	123302	531911					151203	490510
	295206	1.38153e+06					558011	1.42743e+06
	360907	996320					382508	918018
	59401.2	412208					65701.3	424808
	244805	1.03322e+06					250205	1.14482e+06
	626413	1.55523e+06					764115	1.76944e+06
	183604	544511					221404	606612
	517510	1.17362e+06					629113	1.41933e+06
	387008	1.11962e+06					370807	893718
	295206	1.11872e+06					285306	971119
	272705	782116					255605	710114
	445509	1.42473e+06					446409	1.13672e+06
	615612	1.54443e+06					473409	1.27983e+06
	201604	739815					258305	849617
	518410	1.48053e+06					451809	1.29243e+06
	162903	351007					128703	293406
	369007	868517					363607	756915
	207904	641713					277206	535511
	882018	1.41213e+06					855917	1.32753e+06
	118802	318606					69301.4	255605
	417608	1.25733e+06					459909	1.05302e+06
	257405	410408					297006	468009
	226805	562511					256505	727215
	151203	327607
	115202	296106					152103	364507
	73801.5	299706
	234905	436509
	103502	350107
	173703	316806					176404	367207
	191704	432009					153903	360907
	542711	1.48773e+06					438309	1.25463e+06
	275406	664213					146703	498610
	243005	768615					172803	700214
	389708	1.12322e+06					281706	1.13222e+06
	157503	477010					102602	477910
	168303	442809					96301.9	626413
	99002	134103					63001.3	343807
	187204	396908					187204	359107
	57601.2	263705
	144003	333907								89101.8	306006
	71101.4	353707								60301.2	303306
	33300.7	487810								18000.4	281706
	186304	711014								306006	765915
	99902	416708
	105302	626413								109802	882018
	189904	1.20152e+06								181804	1.32663e+06
	60301.2	281706								29700.6	351007
	63901.3	288006								78301.6	314106
	52201	642613
	38700.8	540011
	168303	1.11062e+06								51301	858617
	92701.9	626413
	140403	899118
	119702	952219
	80101.6	548111
	91801.8	289806
	108002	1.22312e+06
	54001.1	641713
	222304	1.79104e+06
	147603	1.25553e+06
	97201.9	577812
	150303	542711
	92701.9	791116
	95401.9	493210
	88201.8	561611
	65701.3	954019
	39600.8	502210
	342907	1.01612e+06
	431109	1.79374e+06
	492310	1.24202e+06
	261905	765015
	112502	687614
	69301.4	388808
	138603	423008
	617412	1.98634e+06
	107102	468909
	65701.3	445509
	136803	936919
	36000.7	415808
	65701.3	370807
	41400.8	318606
	101702	797416
